# Supplementary material for: Identification of an Epi-metabolic dependency on EHMT2/G9a in T-cell acute lymphoblastic leukemia
Source: PubMed Central journal article supplement (PMC9203761; doi:10.1038/s41419-022-05002-5), 2022-06-17

Figure 1G\_actin

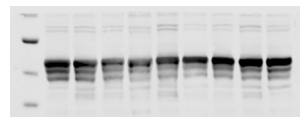

Figure 1G\_ICN1

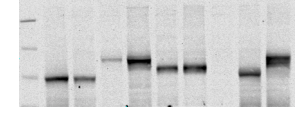

Figure 1G\_EHMT1

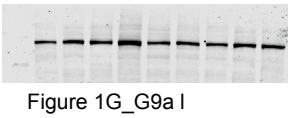

Figure 1G\_G9a l

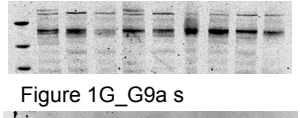

Figure 1G\_G9a s

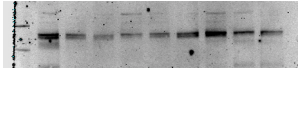

Figure 2B\_PF382\_G9a

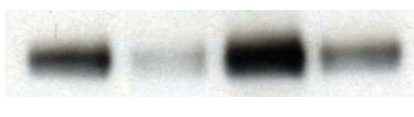

Figure 2B\_SUPT1\_G9a

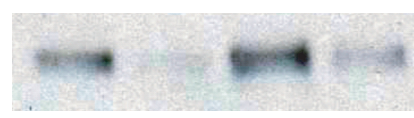

Figure 2B\_SUPT1\_GAPDH

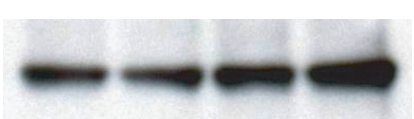

Figure 2B\_PF382\_GAPDH

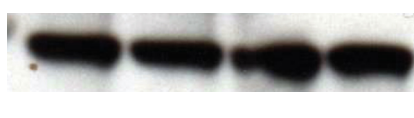

Figure 3A\_H3K9me1

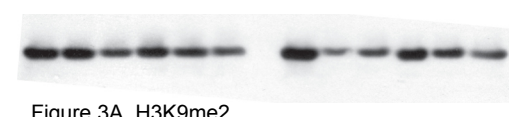

Figure 3A\_H3K9me2

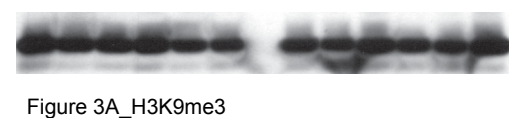

Figure 3A\_H3K9me3

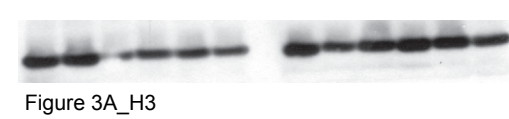

Figure 3A\_H3

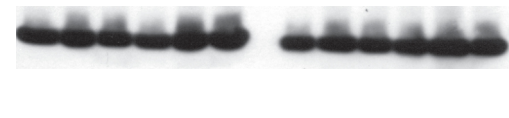

Figure 3D\_H3\_BIX01294\_PF382

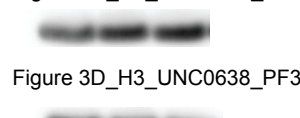

Figure 3D\_H3\_UNC0638\_PF382

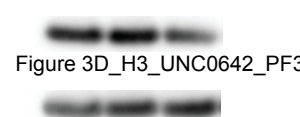

Figure 3D\_H3\_UNC0642\_PF382

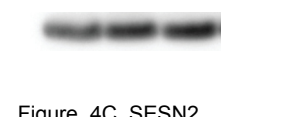

Figure 3D\_H3\_BIX01294\_SUPT1

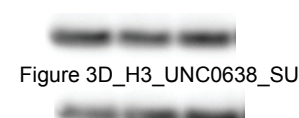

Figure 3D\_H3\_UNC0638\_SUPT1

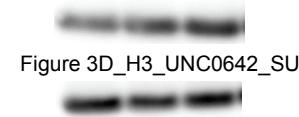

Figure 3D\_H3\_UNC0642\_SUPT1

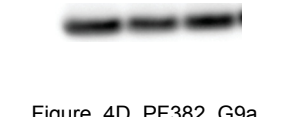

Figure 3D\_H3K9me2\_BIX01294\_PF382

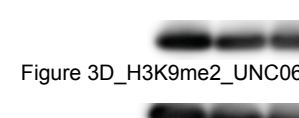

Figure 3D\_H3K9me2\_UNC0638\_PF382

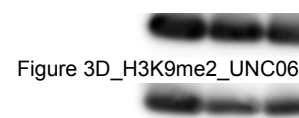

Figure 3D\_H3K9me2\_UNC0642\_PF382

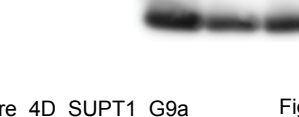

Figure 3D\_H3K9me2\_BIX01294\_SUPT1

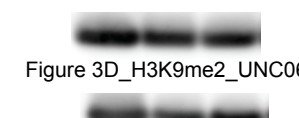

Figure 3D\_H3K9me2\_UNC0638\_SUPT1

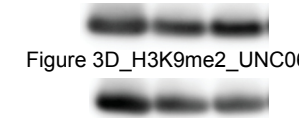

Figure 3D\_H3K9me2\_UNC0642\_SUPT1

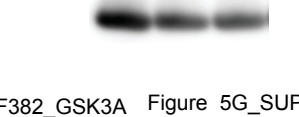

Figure 4C\_SESN2

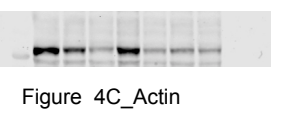

Figure 4C\_Actin

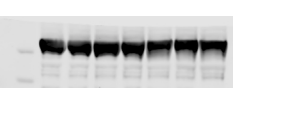

Figure 4D\_PF382\_G9a

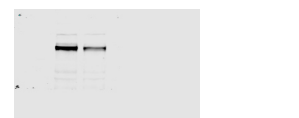

Figure 4D\_PF382\_HSP90

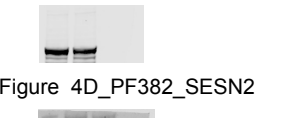

Figure 4D\_PF382\_SESN2

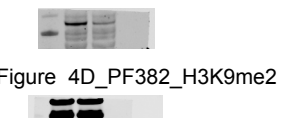

Figure 4D\_PF382\_H3K9me2

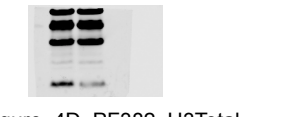

Figure 4D\_PF382\_H3Total

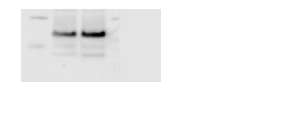

Figure 4D\_SUPT1\_G9a

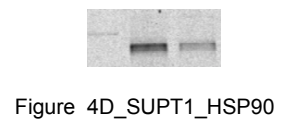

Figure 4D\_SUPT1\_HSP90

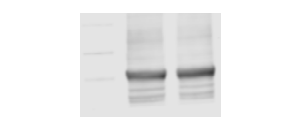

Figure 4D\_SUPT1\_SESN2

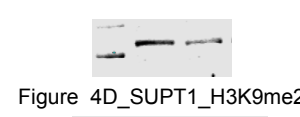

Figure 4D\_SUPT1\_H3K9me2

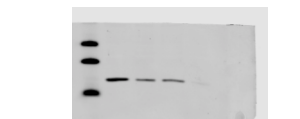

Figure 4D\_SUPT1\_H3Total

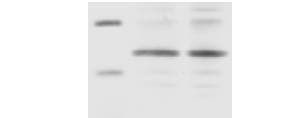

Figure 5G\_PF382\_GSK3A

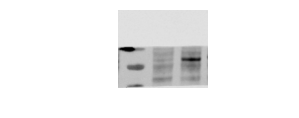

Figure 5G\_SUPT1\_GSK3A

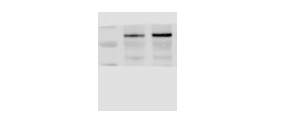

Figure 5G\_PF382\_GSK3B

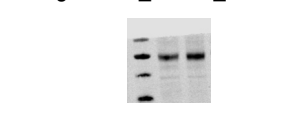

Figure 5G\_SUPT1\_GSK3B

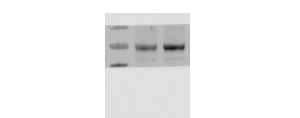

Figure 5G\_PF382\_GSK3

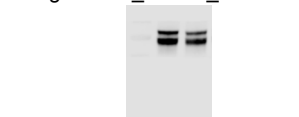

Figure 5G\_SUPT1\_GSK3

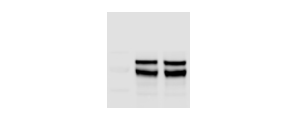

Figure 5H\_PF382\_GSK3A

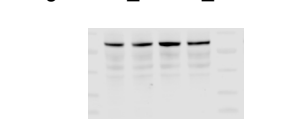

Figure 5H\_PF382\_GSK3B

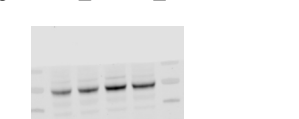

Figure 5H\_SUPT1\_GSK3A

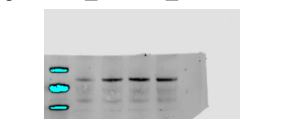

Figure 5H\_SUPT1\_GSK3B

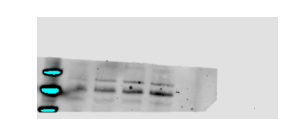

Figure 5H\_PF382\_GSK3

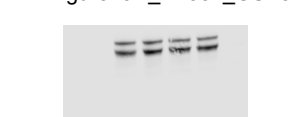

Figure 5H\_PF382\_HSP90

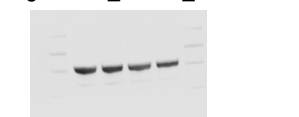

Figure 5H\_SUPT1\_GSK3

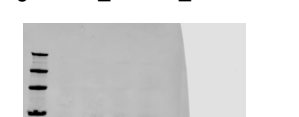

Figure 5H\_SUPT1\_HSP90

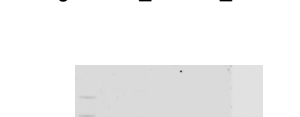

Figure 5I\_UNC0642\_SESN2

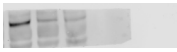

Figure 5I\_UNC0642\_P70S6K

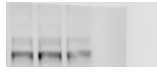

Figure 5I\_UNC0642\_p-mTOR

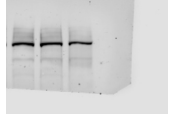

Figure 5I\_UNC0642\_ACTIN

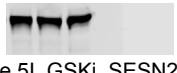

Figure 5I\_GSKi\_SESN2

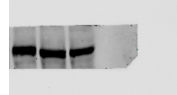

Figure 5I\_GSKi\_P70S6K

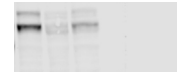

Figure 5I\_GSKi\_p-mTOR

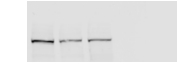

Figure 5I\_GSKi\_ACTIN

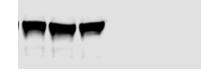

Figure 6C\_LC3B\_SUPT1\_BIX01294\_UNC0638

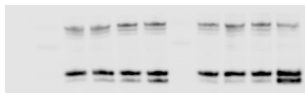

Figure 6C\_LC3B\_PF382\_UNC0638

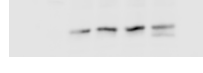

Figure 6C\_LC3B\_PF382\_SUPT1\_UNC0642

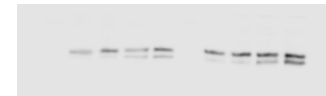

Figure 6C\_LC3B\_PF382\_BIX01294

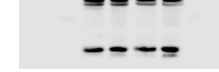

Figure 6C\_HSP90\_SUPT1\_BIX01294\_UNC0638

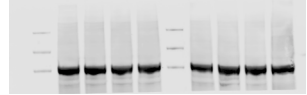

Figure 6C\_HSP90\_PF382\_UNC0638

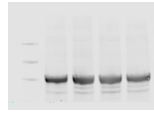

Figure 6C\_HSP90\_PF382\_SUPT1\_UNC0642

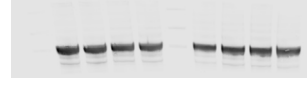

Figure 6C\_HSP90\_PF382\_BIX01294

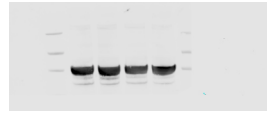

Figure 6E\_PF382\_HSP90

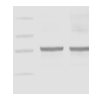

Figure 6E\_LC3B\_SUPT1

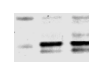

Figure 6E\_HSP90\_SUPT1

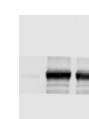

Figure 6E\_G9a\_SUPT1

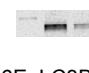

Figure 6E\_LC3B\_PF382

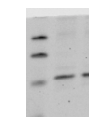

Figure 6E\_PF382\_G9a

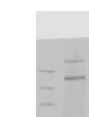

Figure 6H\_SUPT1\_SESN2

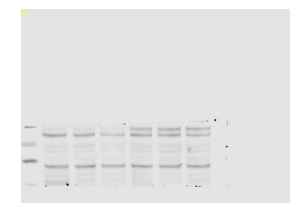

Figure 6H\_SUPT1\_HSP90

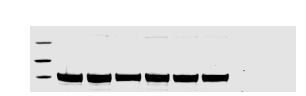

Figure 6H\_PF382\_SESN2

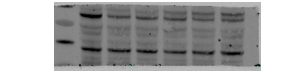

Figure 6H\_PF382\_HSP90

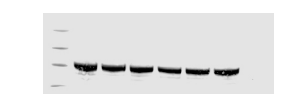

Sup Figure 3B H3 UNC0642 SUPT1

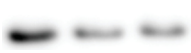

Sup Figure 3B Vinculin UNC0642 SUPT1

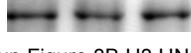

Sup Figure 3B H3 UNC0642 PF382

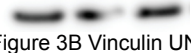

Sup Figure 3B Vinculin UNC0642 PF382

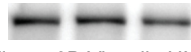

Sup Figure 3B Vinculin UNC0638 PF382

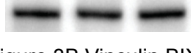

Sup Figure 3B Vinculin BIX01294 PF382

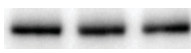

Sup Figure 3B H3K9me2 UNC0642 PF382

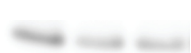

Sup Figure 3B H3K9me2 UNC0638 PF382

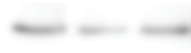

Sup Figure 3B H3 UNC0638 SUPT1

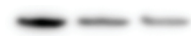

Sup Figure 3B H3 UNC0638 PF382

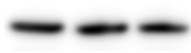

Sup Figure 3B H3 BIX01294 SUPT1

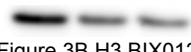

Sup Figure 3B H3 BIX01294 PF382

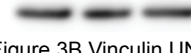

Sup Figure 3B Vinculin UNC0638 SUPT1

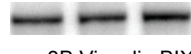

Sup Figure 3B Vinculin BIX01294 SUPT1

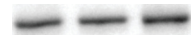

Sup Figure 3B H3K9me2 UNC0642 SUPT1

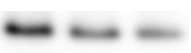

Sup Figure 3B H3K9me2 UNC0638 SUPT1

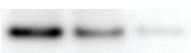

Sup Figure 3B H3K9me2 BIX01294 SUPT1

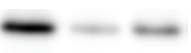

Sup Figure 3B H3K9me2 BIX01294 PF382

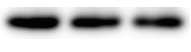

Sup Figure 3C H3K9me3 UNC0642 MOLT16\_DND41

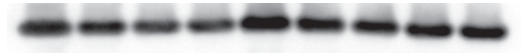

Sup Figure 3C H3K9me2 UNC0642 MOLT16\_DND41

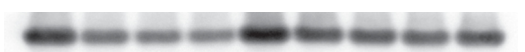

Sup Figure 3C H3 UNC0642 MOLT16\_DND41

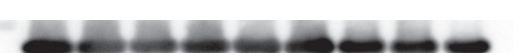

Sup Figure 3C H3K9me1 UNC0642 MOLT16\_DND41

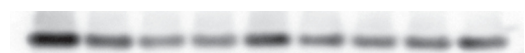

Sup Figure 3D H3 UNC0642 Loucy\_ALLSIL

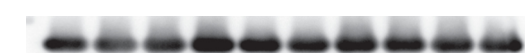

Sup Figure 3D H3K9me1 UNC0642 Loucy\_ALLSIL

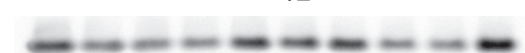

Sup Figure 3D H3K9me2 UNC0642 Loucy\_ALLSIL

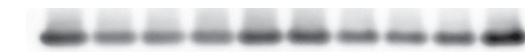

Sup Figure 3D H3K9me3 UNC0642 Loucy\_ALLSIL

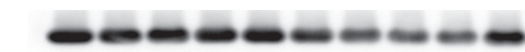

Sup Figure 3E H3K9me3  
UNC0642 DND41

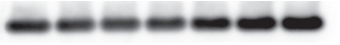

Sup Figure 3E H3K9me3  
UNC0642 MOLT16

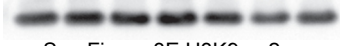

Sup Figure 3E H3K9me2  
UNC0642 DND41

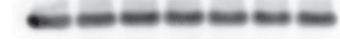

Sup Figure 3E H3K9me2  
UNC0642 MOLT16

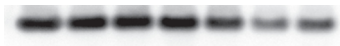

Sup Figure 3E H3K9me1  
UNC0642 DND41

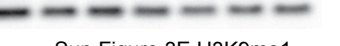

Sup Figure 3E H3K9me1  
UNC0642 MOLT16

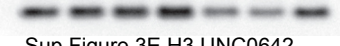

Sup Figure 3E H3  
UNC0642  
MOLT16

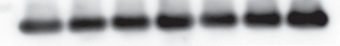

Sup Figure 3E H3  
UNC0642  
DND41

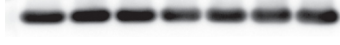

Sup Figure 3F H3K9me3 UNC0642 Loucy|ALLSIL

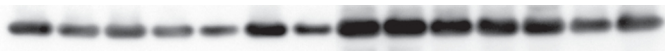

Sup Figure 3F H3K9me2 UNC0642 Loucy|ALLSIL

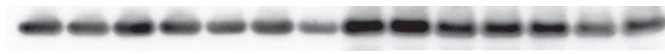

Sup Figure 3F H3 UNC0642 Loucy|ALLSIL

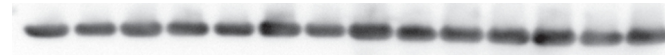

Sup Figure 3F H3K9me1 UNC0642 Loucy|ALLSIL

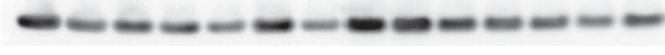

Sup Figure 4E SESN2

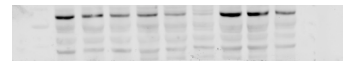

Sup Figure 4E HSP90

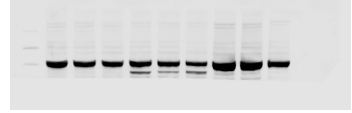

Sup Figure 5A SESN2  
PF382

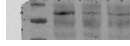

Sup Figure 5A HSP90  
SUPT1

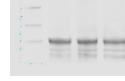

Sup Figure 5A SESN2  
SUPT1

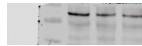

Sup Figure 5A HSP90  
PF382

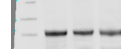

Sup Figure 6B SUPT1  
UNC0638 HSP90

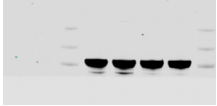

Sup Figure 6B PF382  
BIX01294 GSK3A

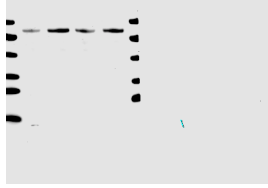

Sup Figure 6B PF382  
UNC0638 GSK3 Tot

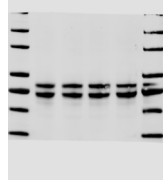

Sup Figure 6C PF382|SUPT1  
HSP90

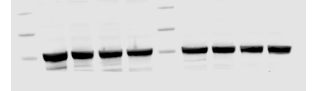

Sup Figure 6B PF382  
UNC0638 HSP90

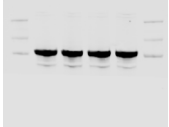

Sup Figure 6B SUPT1  
UNC0638 GSK3B

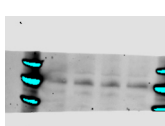

Sup Figure 6B PF382  
BIX01294 GSK3 Tot

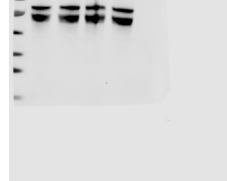

Sup Figure 6C PF382|SUPT1  
P-AKT

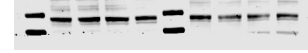

Sup Figure 6B SUPT1  
UNC0638 GSK3A

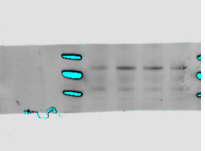

Sup Figure 6B PF382  
BIX01294 HSP90

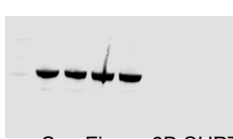

Sup Figure 6C  
SUPT1 LC3B

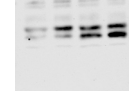

Sup Figure 6C  
SUPT1 P-AMPKA

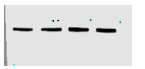

Sup Figure 6B SUPT1  
UNC0638 GSK3 Tot

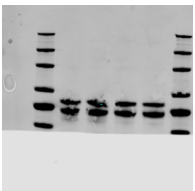

Sup Figure 6B SUPT1  
BIX01294 GSK3 Tot

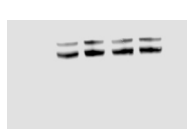

Sup Figure 6B PF382  
BIX01294 GSK3B

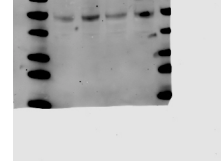

Sup Figure 6C  
PF382 LC3B

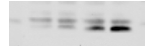

Sup Figure 6C  
PF382 P-AMPKA

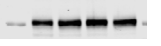

Sup Figure 6B SUPT1  
BIX01294 GSK3A

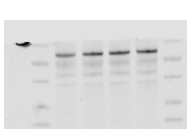

Sup Figure 6B PF382  
UNC0638 GSK3A

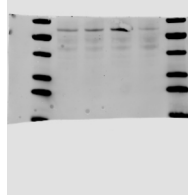

Sup Figure 7B  
PF382 HSP90

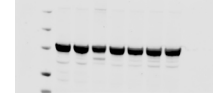

Sup Figure 6B SUPT1  
BIX01294 HSP90

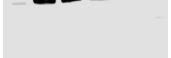

Sup Figure 7B  
SUPT1 HSP90

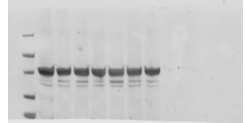

Sup Figure 6B PF382  
UNC0638 GSK3B

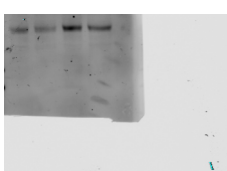

Sup Figure 7B  
SUPT1 LC3B

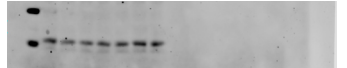

Sup Figure 6B SUPT1  
BIX01294 GSK3B

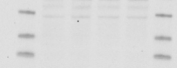

Sup Figure 7B  
PF382 LC3B

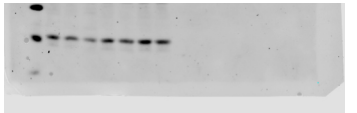

Supplement: 41419_2022_5002_MOESM4_ESM.pdf [file 41419_2022_5002_MOESM4_ESM.pdf]
